1           **The *Fusarium graminearum* transporters Abc1 and Abc6 are important for xenobiotic**  
2           **resistance, trichothecene accumulation, and virulence to wheat.**

3           Sean P. O'Mara<sup>1</sup>, Karen Broz<sup>2</sup>, Yanhong Dong<sup>3</sup>, H. Corby Kistler<sup>2,3\*</sup>

4           <sup>1</sup>Department of Plant and Microbial Biology, <sup>2</sup>USDA ARS Cereal Disease Laboratory, St. Paul, MN 55108,  
5           USA, <sup>3</sup>Department of Plant Pathology, University of Minnesota, St. Paul, MN 55108, USA

6           \*Corresponding Author: H. Corby Kistler (hckist@umn.edu)

7           Keywords: deoxynivalenol, mycotoxin, plant pathogen

8           **Abstract**

9           The plant pathogenic fungus *Fusarium graminearum* is the causal agent of Fusarium Head Blight  
10          (FHB) disease on small grain cereals. *F. graminearum* produces trichothecene mycotoxins such as  
11          deoxynivalenol (DON) that are required for full virulence. DON must be exported outside the cell to  
12          cause FHB disease, a process that may require the involvement of membrane-bound transporters. In  
13          this study we show the deletion of membrane-bound transporters results in reduced DON accumulation  
14          as well as reduced FHB symptoms on wheat. Deletion of the ATP-Binding Cassette (ABC) transporter  
15          *Abc1* results in the most severe reduction in DON accumulation and virulence. Deletion of another ABC  
16          transporter, *Abc6*, also reduces FHB symptoms to a lesser degree. Combining deletions fails to reduce  
17          DON accumulation or virulence in an additive fashion, even when including an  $\Delta abc1$  deletion.  
18          Heterologous expression of *F. graminearum* transporters in a DON-sensitive strain of yeast confirms  
19          *Abc1* as a major DON resistance mechanism. Yeast expression further indicates that multiple  
20          transporters, including *Abc1* play an important role in resistance to the wheat phytoalexin 2-  
21          benzoxazolinone (BOA) and other xenobiotics. Thus, *Abc1* may contribute to wheat virulence both by  
22          allowing export of DON and by providing resistance to the wheat phytoalexin BOA. This research  
23          provides useful information which may aid in designing novel management techniques of FHB or other  
24          destructive plant diseases.

## 25 Introduction

26 Fusarium is a cosmopolitan genus comprised of not only soil-borne and endophytic fungi which  
27 live asymptotically within hosts, but also fungal species that are economically and agronomically  
28 important plant pathogens (Imazaki and Kadota 2015; Lofgren et al. 2018; Wachowska et al. 2017;  
29 Waweru et al. 2014). *Fusarium graminearum* is one of the causal agents of Fusarium Head Blight (FHB)  
30 disease of small grain cereals and has received considerable attention due to its ability to act as a plant  
31 pathogen and to produce mycotoxins that impact animal and human health. While occurring world-  
32 wide, FHB has been a persistent problem in the United States for many years, especially since a large  
33 outbreak in the 1990's. The disease management costs and direct impact of FHB outbreaks have  
34 resulted in annual losses exceeding \$1.4B in the United States (Wilson et al. 2018).

35 *F. graminearum* produces several secondary metabolites which act as virulence factors during  
36 plant host infection (Bahadoor et al. 2018; Proctor 1995; Wipfle et al. 2019), including sesquiterpenoid  
37 trichothecenes. Trichothecenes inhibit protein synthesis by binding to the peptidyl-transferase domain  
38 of eukaryotic ribosomes (Fried and Warner 1981; Garreau de Loubresse et al. 2014; Harris and Gleddie  
39 2001), an effect which poses significant risk to plants and animals. The major trichothecene produced by  
40 many strains of *F. graminearum* is deoxynivalenol (DON), which is essential for full virulence on wheat  
41 (Desjardins et al. 1996) and may persist as a contaminant in affected grains. Exposure to DON can lead  
42 to many cytological effects in eukaryotes, including DNA/RNA synthesis disruption, ribotoxic stress,  
43 induction of apoptosis, and membrane cytotoxicity (Pestka 2007; Rocha et al. 2005). Export of  
44 trichothecenes by *F. graminearum*, whether by vesicular traffic or by membrane-bound transporters,  
45 may be essential for full virulence to plants (Abou Ammar et al. 2013; Gardiner et al. 2013; Menke et al.  
46 2012; O'Mara et al. 2020) Additionally, due to potential trichothecene toxicity, *F. graminearum* must  
47 either sequester or export this secondary metabolite or risk self-inhibition (Menke et al. 2012; Wang et  
48 al. 2018).

49           One of the primary sources of resistance to toxic secondary metabolites in fungi is through the  
50 actions of membrane-bound transporters, such as ATP-binding cassette (ABC) and Major-facilitator  
51 superfamily (MFS) transporters (Gulshan and Moye-Rowley 2007; Perlin et al. 2014). The typical  
52 structure of an ABC transporter includes two core domains, a nucleotide-binding domain (NBD) and a  
53 transmembrane domain consisting of six transmembrane-spanning helices (TMD) (Kovalchuk and  
54 Driessen 2010). MFS transporters are generally smaller than ABC transporters and consist of 12 or 14  
55 transmembrane spanning helices without any NBD domains. ABC transporters utilize adenosine  
56 triphosphate (ATP) to move molecules across membranes while MFS transporters utilize electrochemical  
57 membrane potential (often due to a pH gradient) to accomplish the same functionality (Coleman and  
58 Mylonakis 2009).

59           Both ABC and MFS transporters have many crucial functions in fungi including nutrient  
60 uptake/acquisition, waste removal, cellular signaling, self-defense, and other developmental processes.  
61 In pathogenic fungi, transporters are important for fungal infection, colonization, and disease  
62 progression (Perlin et al. 2014). The first identified pleiotropic drug resistance protein, the ABC-G  
63 transporter *PDR5*, was described from baker's yeast *Saccharomyces cerevisiae* (Gulshan and Moye-  
64 Rowley 2007). *PDR5* has orthologs in most other ascomycetes including *Fusarium* where it has been  
65 associated with virulence by conferring resistance to plant phytoalexins (Coleman et al. 2011; Fleissner  
66 et al. 2002).

67           *F. graminearum* has 62 predicted ABC proteins (Kovalchuk and Driessen 2010), four of which  
68 appear to be involved in virulence (Yin et al. 2018). The ABC transporter FgAbc9 (FGSG\_07325) plays a  
69 crucial role in the export of the plant defense hormone salicylic acid, and is also involved in growth,  
70 resistance to the anti-fungal compound tebuconazole, and accumulation of DON (Qi et al. 2018).  
71 Perhaps the most studied membrane-bound transporter of *F. graminearum*, the ABC transporter Abc1  
72 (FGSG\_04580) also is important for resistance to fungicides and other xenobiotics. Deletion mutants of

73 *Abc1* show reduced virulence during wheat crown and root rot infections (Gardiner et al. 2013).  
74 Similarly, other *F. graminearum* strains with the FGSG\_04580 gene deleted (called *Abc3* in this  
75 reference), show reduced virulence on wheat, barley, and maize, as well as altered mycotoxin  
76 production (Abou Ammar et al. 2013). *Abc1* is also involved in zearalenone (an estrogenic metabolite of  
77 *F. graminearum*) transport and tolerance to antifungal compounds (Abou Ammar et al. 2013; Gardiner  
78 et al. 2013; Lee et al. 2011).

79 In addition to ABC transporters, a number of *F. graminearum* MFS transporters have been  
80 suggested to be involved in toxin export and resistance. Wang and colleagues (2018) identified 33  
81 transporters, 15 of which were MFS transporters, which were specifically induced by externally added  
82 DON. Furthermore, a number of the identified MFS transporters had homologs known to be involved in  
83 resistance to toxic compounds and secondary metabolite export in other fungi (Wang et al. 2018).  
84 Within the core trichothecene biosynthetic gene cluster of *F. graminearum* is the gene *Tri12*  
85 (FGSG\_03541) which encodes an MFS transporter (Proctor et al. 2009). Disruption of the *Tri12* gene of *F.*  
86 *sporotrichioides*, a close relative of *F. graminearum*, results in highly reduced trichothecene  
87 accumulation in culture and reduced resistance to exogenously applied trichothecenes (Alexander et al.  
88 1999). However, disruption of *Tri12* in *F. graminearum* results in only slightly reduced DON  
89 accumulation (Menke et al. 2012).

90 The goal of this research was to test other ABC and MFS transporters or combinations of  
91 transporters, for their role in trichothecene export and xenobiotic resistance in *F. graminearum*. In  
92 addition to further characterization of the transporters *Tri12* and *Abc1*, we included other ABC and MFS  
93 transporters previously identified and suspected to have a role in DON export. The ABC transporter *Abc6*  
94 (FGSG\_11028) and an MFS transporter *Mfs1* (FGSG\_07802) are either regulated by or otherwise co-  
95 expressed with genes under the control of the trichothecene regulatory protein *Tri6* (Seong et al. 2009).  
96 During *F. graminearum* infection of wheat, *Abc6* and *Mfs1* are significantly up-regulated

97 contemporaneously with high levels of DON production (Zhang et al. 2012) and in a *Tri12* deletion  
98 mutant background, these two genes are significantly upregulated under toxin producing conditions  
99 (Nakajima et al. 2015). We hypothesize that their gene products may play a redundant role in DON  
100 transport, and “fill in” when *Tri12* is not available.

101 We hypothesize that multiple, functionally redundant mechanisms for DON transport may exist  
102 within *F. graminearum* cells. If this is the case, deletion of only a single mechanism for transport may not  
103 lead to a discernable phenotype with respect to fungal growth, DON accumulation, or pathogenic  
104 aggressiveness. However, disruption of two or more mechanisms for DON transport might be expected  
105 to have greater impact. To test this, we combined deletion mutations for different membrane bound  
106 transporters to assess the effect of disrupting multiple export pathways. These deletion mutants were  
107 analyzed for growth and DON accumulation *in planta*. Additionally, the protein coding regions of  
108 individual genes were expressed in a DON sensitive strain of *S. cerevisiae* to verify their direct  
109 involvement in DON export and resistance to inhibition by a number of xenobiotic compounds.

## 110 **Materials and Methods**

### 111 *Generating F. graminearum deletion mutants*

112 Genetic deletion mutants of *F. graminearum* strain PH-1 (NRRL 31084) were generated using the  
113 split marker homologous recombination technique (Goswami 2012) with modifications previously  
114 described (O’Mara et al. 2020). A previously generated  $\Delta tri12$  disruption mutant was used (Menke et al.  
115 2012). Primers utilized in the transformation and confirmation process are listed in Table S1. Target  
116 genes were replaced with the neomycin phosphotransferase (NPT) or nourseothricin acyltransferase  
117 (NAT) resistance genes as selectable markers (Fuchs et al. 2004; Menke et al. 2013). Transformations  
118 and single-spore isolations were completed as previously described (O’Mara et al. 2020). Up to 10  
119 transformant colonies were picked for further single-spore isolation and genetic confirmation. Mutants

120 of *F. graminearum* were crossed to generate double- and triple knockout mutants. Mutant parents  
121 contained different antibiotic-resistance selectable markers. Sexual crosses and ascospore collection  
122 and screening were performed as previously described (Pasquali and Kistler 2006; O'Mara et al. 2020).  
123 Single spore isolation of each transformant was performed as for single knockout mutants, except that  
124 media contained two antibiotics.

#### 125 *Confirmation of F. graminearum transformants*

126 Site-directed deletion of native genes in *F. graminearum* mutants was confirmed by PCR as  
127 previously described (O'Mara et al. 2020) using the CTAB genomic DNA extraction technique (Gale et al.  
128 2011). Site-directed gene deletion and replacement with an antibiotic-resistance selectable marker was  
129 confirmed by amplifying the targeted locus using a primer pair which annealed upstream and  
130 downstream of the gene. Changes in amplicon size corresponding to the replacement of the native gene  
131 with the antibiotic-resistance marker indicated site-directed gene replacement. In cases where the  
132 amplicon sizes were too similar to distinguish using this method, an either/or amplification technique  
133 was employed. In the latter case, a forward primer which annealed upstream of the targeted locus was  
134 paired with either a reverse primer which annealed to the end of the native gene or a reverse primer  
135 which annealed to the end of the antibiotic-resistance gene. This amplification pair would indicate  
136 whether the full native gene remained in its resident locus, or if the full antibiotic-resistance gene was  
137 inserted into the locus.

#### 138 *Growth of F. graminearum in culture*

139 Conidial suspensions of each *F. graminearum* mutant were made by growing in 50 mL of  
140 carboxy-methyl cellulose (CMC) medium (Cappellini and Peterson 1965) for ~5 days. Conidia were  
141 collected and enumerated as previously described (O'Mara et al. 2020) then suspended in water at 2 x  
142 10<sup>4</sup> conidia/mL for *in vitro* analyses or 1 x 10<sup>6</sup> conidia/mL for plant inoculations.

143 To assess the ability of *F. graminearum* deletion mutants to utilize different laboratory media,  
144 deletion mutants were grown on carrot, ½ PDA, Czapek-Dox, complete, minimal, and V8 agar media  
145 (Klittich and Leslie 1988; Puhalla and Spieth 1983; Rodriguez Estrada et al. 2011). A 3 mm diameter plug  
146 of mycelium was placed at the center of each and grown in triplicate at 25°C with 12 h light, 12 h dark  
147 for 3 days before determining the area (mm<sup>2</sup>) of hyphal growth using a Carestream 4000MM Pro Image  
148 Station, with Carestream Molecular Imaging Software v.5.2.2.15761 (Carestream Health, Inc., Rochester,  
149 NY, USA).

150 DON accumulation and pathogenicity of *F. graminearum* transporter deletion mutants

151 The ability of *F. graminearum* mutants to cause FHB symptoms and accumulate DON was  
152 evaluated in wheat cultivar Norm, as previously described (O'Mara et al. 2020). Two weeks after point-  
153 inoculation of the fifth fully formed spikelet, heads were scored for FHB disease symptoms (bleached,  
154 shriveled, necrotic grains) by counting the number of diseased spikelets, up to 10, surrounding the point  
155 of inoculation. The inoculated spikelet was then removed from the wheat head and weighed in a tared  
156 1-dram screw-cap vial, frozen at -80°C overnight and analyzed for DON, 3-ADON, and 15-ADON (total  
157 DON) by GC-MS using methods previously described (Goswami and Kistler 2005).

158 *Generation of F. graminearum transporter containing yeast transformants*

159 *F. graminearum* transporters were expressed in the DON-sensitive *Saccharomyces cerevisiae*  
160 strain YZGA515 (Poppenberger et al. 2003), generously provided by Dr. Gerhard Adam. Expression  
161 plasmids were generated using Gateway cloning technology (Invitrogen, Thermo-Fisher Scientific,  
162 Waltham, MA, USA). A cDNA of the *F. graminearum* *Abc1* gene codon-optimized for yeast was  
163 synthesized by Invitrogen GeneArt gene synthesis and inserted onto the pENTR221 vector. Codon-  
164 optimized cDNAs for *Tri12*, *Mfs1*, and *Abc6* were synthesized by Integrated DNA Technologies (IDT,  
165 Coralville, IA, USA) and inserted on pUC-IDT vectors. *E. coli* strains containing the empty expression

166 vector ZM552 or the yeast pleiotropic drug resistance transporter Pdr5 on the ZM552 plasmid were  
167 purchased from the DNASU plasmid repository (Arizona State University, Tempe, AZ, USA). ZM552 was  
168 used as an empty vector control for all tests, and Pdr5 was used as a positive control complementation.

169 To begin the Gateway cloning process, forward primers containing the attB1 site and reverse  
170 primers containing the attB2 site (Table S1) were purchased from Invitrogen. These primers were used  
171 to amplify the *F. graminearum* transporter coding regions (*Tri12*, *Mfs1*, and *Abc6*) from the pUC-IDT  
172 plasmids. Once purified, the attB site flanked amplicons were cloned onto the Gateway donor vector  
173 pDONR221 using the Gateway BP Clonase II enzyme mix kit, generating pENTR221 vectors. Expression  
174 plasmids were generated by cloning the *F. graminearum* transporter coding regions from the pENTR221  
175 vectors (now *Tri12*, *Abc1*, *Mfs1*, and *Abc6*) onto the ZM552 empty vector using the Gateway LR Clonase  
176 II enzyme mix kit. Following the Gateway LR cloning step, all the transporter genes from *F. graminearum*  
177 and *S. cerevisiae* were located on the ZM552 vector backbone and named pEXP552\_*Gene Name* (e.g.  
178 pEXP552\_FgTri12 or pEXP552\_ScPdr5). All pENTR221 and pEXP552 plasmids were cloned into Invitrogen  
179 OmniMAX 2-T1 or New England Biolabs (Ipswich, MA, USA) 10-Beta *E. coli* for propagation. The  
180 pDONR221 plasmid was cloned into Invitrogen ccdB Survival 2-T1 *E. coli* for propagation. Confirmations  
181 of all cloning steps were performed by extracting plasmid DNA from *E. coli* using the Qiagen Miniprep kit  
182 (Hilden, Germany) and performing double restriction enzyme digests using EcoRI and HindIII purchased  
183 from New England Biosciences (NEB, Ipswich, MA, USA), using the manufacturer's recommended  
184 procedures.

185 All transformation plasmids were transformed into *S. cerevisiae* YZGA515 using the Sigma-  
186 Aldrich (St. Louis, MO, USA) YEAST1 yeast transformation kit, using manufacturer's recommended  
187 procedures. Transformed YZGA515 strains were streaked and maintained on Synthetic Complete  
188 Medium (Dunham et al. 2015) supplemented with leucine drop out powder (Sigma Aldrich). To confirm  
189 proper transformation of yeast strains, plasmid DNA was extracted from transformed yeast using the



190 Qiagen Miniprep kit and re-transformed into *E. coli* for propagation. Plasmid DNA from re-transformed  
191 *E. coli* was extracted again using the Qiagen Miniprep kit and digested using EcoRI and HindIII as before.  
192 Restriction digests from original transformed *E. coli* strains were compared to digests from re-  
193 transformed *E. coli* to confirm identical plasmid composition.

#### 194 *Expression of F. graminearum transporters in a susceptible yeast line*

195 Transformed *S. cerevisiae* YZGA515 strains were analyzed for their sensitivity to DON and its  
196 acetylated derivatives 3-acetyl deoxynivalenol (3-ADON) and 15-acetyl deoxynivalenol (15-ADON). Pre-  
197 cultures of YZGA515 transformants were grown in liquid SCM-leu medium for 4-5 days at 30°C and 300  
198 rpm. Pre-cultures were diluted with 2x SCM-leu to an optical density (600 nm absorbance) of 0.1 for  
199 inoculation. In a 96-well microtiter plate, 100 µL of YZGA515 inoculum was added to 100 µL ddH<sub>2</sub>O  
200 supplemented with a concentration gradient of DON, 3-ADON, or 15-ADON. Concentration series  
201 included 0, 20, 30, 60, 120, and 250 ppm DON or 3-ADON, and 0, 5, 10, 15, 20, and 30 ppm 15-ADON. All  
202 six YZGA515 transformants were inoculated onto the same 96-well microtiter plate containing six  
203 DON/ADON concentrations, with an extra well containing 1x SCM-leu without yeast as a medium  
204 control. Plates were sealed with parafilm and incubated in the dark for 5 days at 30°C and 300 rpm.  
205 After incubation, well contents were homogenized by gentle pipetting and the optical density of each  
206 well was taken using a Thermo-Fisher Scientific Varioskan Flash with SkanIt RE software. DON/ADON  
207 plates were run in triplicate and sensitivity was analyzed as a percent change in optical density  
208 compared to 0 ppm control.

209 To test whether low pH would better facilitate DON export in *S. cerevisiae* YZGA515 lines  
210 expressing *F. graminearum* MFS transporters (Gardiner et al. 2009), the plate assay was repeated using  
211 glycine-HCl buffered SCM-leu. To make buffered medium, 1.875 g glycine was added to 200 mL 2x SCM-  
212 leu. Mixture was then titrated with 5M HCl to pH 2.5. The buffered medium was then brought up to 250

213 mL using ddH<sub>2</sub>O and sterilized by filtering through a Corning 0.22 µm filter unit (Corning Life Sciences,  
214 Corning, NY, USA). Assay setup and optical density measurements were performed as previously  
215 described above.

216 To understand how the *F. graminearum* transporters may provide resistance to xenobiotic  
217 compounds, the transformed yeast lines were tested against a concentration series of the plant  
218 phytoalexin 2-benzoxazolinone (BOA). Transformant strains were grown in 5 mL SCM-leu medium for  
219 4~5 days at 30°C and 300 rpm. Cultures were centrifuged at 1,200 x g for 5 minutes and resuspended in  
220 sterile water to an optical density of OD=0.38. BOA was dissolved in DMSO to concentration of 500  
221 mg/mL. In a 96-well plate, 4 µL of YZGA515 transformant cell suspensions were inoculated into 200 µL  
222 SCM-leu medium containing 0, 100, 200, 300, 400, or 500 ppm BOA, with a final concentration of 0.1%  
223 DMSO. After inoculation, 96-well plates were incubated at 30°C and 300 rpm for 3 days. Optical density  
224 of each well was determined using a Thermo-Fisher Scientific Varioskan Flash with SkanIt RE software.  
225 Plates were run in triplicate and sensitivity was analyzed as a percent change in optical density  
226 compared to 0 ppm control.

227 The yeast transformants were also tested against 24 xenobiotic compounds at 4 concentrations  
228 using Biolog plate PM24C (Biolog Inc, Hayward, CA, USA). Transformants were grown and resuspended  
229 as for BOA plates then 630 µL of the cell suspension was added to 29.38 mL of Biolog PM inoculating  
230 fluids using the manufacturer's recommended protocol and mixed thoroughly. Using an 8-channel  
231 pipette, 100 µL of the inoculation fluid was transferred into each well of the 96-well PM24C plate. Plates  
232 were incubated at 30°C for 3 days before recording the OD value of each well. Plates were conducted in  
233 triplicate for each yeast transformant. Raw OD values for each transformant were subtracted from the  
234 OD values of the ZM552 empty vector control for each replicate. Afterwards, the relative OD values for  
235 each transformant were averaged across the three replicates for a final growth value.

236 *Data analysis*

237 *F. graminearum* growth rates, FHB disease symptoms, and DON concentrations were analyzed in  
238 R Statistical Software version 3.5.1 (R Core Team 2018). Data were analyzed by a one-way ANOVA with a  
239 Tukey's post-hoc test to compare all pair-wise interactions. ANOVAs for *in vitro* and *in planta*  
240 inoculations were blocked for inoculation date, to better address inter-genotype differences. Sensitivity  
241 of *S. cerevisiae* to exogenous DON and BOA was analyzed by a one-way ANOVA with a Dunnett's post-  
242 hoc test (Hothorn et al. 2008) to compare differences from the control group. ANOVAs were conducted  
243 on raw optical density values (600nm) while figures show percent growth of genotype compared to the  
244 0 ppm concentrations.

245 **Results**

246 *Confirmation of F. graminearum mutants*

247 Genes for *F. graminearum* membrane-bound transporters potentially involved in DON export  
248 and FHB virulence were knocked out to assess their function in these processes. All knockouts were  
249 performed by replacing the native gene with a neomycin (neoR) or nourseothricin (ntcR) resistance  
250 gene. Mutant genotypes were confirmed by PCR, using changes in amplicon size or by selectively  
251 amplifying either the wild-type locus or its resistance-construct replacement (Figure S1). All  
252 transformations yielded at least one mutant which grew on antibiotic selection and amplified a PCR  
253 product indicative of a successful site-directed, gene replacement deletion; most yielded multiple  
254 deletion candidates and a single mutant was selected for further analysis. Deletion phenotypes were  
255 further confirmed for DON accumulation by comparing neoR or ntcR deletion mutants with an  
256 independently generated hygromycin (hygR) deletion mutant. All deletion mutant pairs (neoR vs. hygR  
257 or ntcR vs. hygR) accumulated the same levels of DON *in vitro* (Figure S2).

258 *F. graminearum* transporter deletion mutants are not altered in growth or morphology

259 Deletion mutants of *F. graminearum* were assessed for their growth rates and phenotype on six  
260 different laboratory media. Growth of all mutant genotypes at three days post inoculation was not  
261 significantly different from the wildtype ( $p > 0.05$ ; Table S2). Additionally, deletion of membrane-bound  
262 transporters in *F. graminearum* did not manifest any overt phenotypes when grown on laboratory  
263 media, even when combining multiple deletions (Figure S3).

264 *Multiple transporter mutants show reduced DON accumulation and virulence in wheat*

265 *F. graminearum* knockout mutants were tested for their ability to accumulate DON plus its  
266 acetylated derivatives (total DON) and cause FHB symptoms *in planta*. Numerous combinations of  
267 transporter deletion mutants were significantly reduced in the ability to accumulate DON ( $F = 35.76$ ,  
268  $df = 346$ ,  $p < 2.2 \times 10^{-16}$ ). Two levels of effect were seen (Figure 1A). Deletion of the *Tri12* gene reduced DON  
269 accumulation in wheat approximately 35% while deletion of the *Abc1* transporter gene reduced DON  
270 accumulation in wheat by 65%. Combining the  $\Delta abc1$  and the  $\Delta tri12$  alleles did not reduce DON  
271 accumulation beyond that seen for the  $\Delta abc1$  alone. Likewise, combining the  $\Delta abc6$  or  $\Delta mfs1$  alleles  
272 with  $\Delta tri12$ , as double or triple mutants, didn't reduce DON accumulation beyond the reduction seen in  
273 the  $\Delta tri12$  mutant alone.

274 Infected spikes were assessed 14 days post inoculation for the spread of FHB disease symptoms  
275 and significant differences were detected between the genotypes ( $F = 25.96$ ,  $df = 346$ ,  $p < 2.2 \times 10^{-16}$ ). FHB  
276 symptoms followed a somewhat similar trend as seen for DON accumulation *in planta* (Figure 1B).  
277 However, deletion of the *Abc6* gene reduced FHB spread by ~30% while deletion of *Abc1* reduced FHB  
278 spread by ~78%. Again, combining multiple mutations was not able to significantly reduce FHB  
279 symptoms below those of the parent genotypes. These results fail to indicate an additive effect of

280 multiple transporter deletions but do suggest that *Abc1* plays a substantial role in DON accumulation  
281 and FHB virulence, while other transporters play a more minor role.

## 282 *F. graminearum* transporters alter DON and BOA sensitivity in a susceptible yeast line

283 Four *F. graminearum* membrane-bound transporters were expressed in a DON-sensitive yeast  
284 strain YZGA515 and exposed to a concentration series of DON and acetylated derivatives 15-ADON and  
285 3-ADON to assess the function of these transporters. The yeast multidrug resistance transporter *Pdr5*  
286 expressed in YZGA515 was used as a positive control, and YZGA515 without an insert was used as a  
287 negative control. The YZGA515 *FgAbc1* strain showed a substantial increase in resistance to DON, 15-  
288 ADON, and 3-ADON (Figure 2), showing up to six-fold increased resistance to the toxins as compared to  
289 the vector control. The native *ScPdr5* strain also showed a substantial increase in resistance to the  
290 toxins. The others, including the *FgTri12*, *FgMfs1*, and *FgAbc6* strains, showed little to no increase in  
291 resistance to DON and 15-ADON but *FgAbc6* may allow for some resistance to higher levels of 3ADON.  
292 Interestingly, the two MFS transporter strains, *FgTri12* and *FgMfs1*, were actually more sensitive to DON  
293 and 15-ADON at lower concentrations than the empty vector control. To determine if these MFS  
294 transporters, which are predicted proton antiporters, would provide resistance to DON at low pH, all  
295 transformants were subsequently tested against DON in acidified medium.

296 When the assays were repeated in medium buffered to pH 2.5 with glycine-HCl, the *FgTri12*  
297 strain was increased in resistance and was no more sensitive to DON than the empty vector control at  
298 20 ppm, the lowest concentration of DON tested (Figure 3). However, at the next higher concentration  
299 (30 ppm) the *FgTri12* strain again showed greater DON sensitivity than the control as did *FgMfs1* and  
300 *FgAbc6*. This suggests that the hydrogen ion concentration can impact the activity of *FgTri12* but only at  
301 lower DON concentrations. This is of note because *F. graminearum* establishes an acidic extracellular  
302 environment under toxin-inducing conditions (Gardiner et al. 2009) that may provide the proton-motive

303 force to affect Tri12-mediated transport. The *FgAbc1* and *ScPdr5* strains continued to show increased  
304 resistance to DON as compared to the empty vector control (Figure 3).

305 To assess the ability of the *F. graminearum* transporters to provide resistance to xenobiotics,  
306 YZGA515 strains were exposed to a concentration series of the wheat phytoalexin 2-benzoxazolinone  
307 (BOA) for 3 days. The empty vector control strain ZM552 showed moderate sensitivity to BOA, with an  
308 estimated EC50 value of approximately 250 ppm (Figure 4). The *FgMfs1* strain showed increased  
309 sensitivity to BOA, with an estimated EC50 value of 160 ppm. Surprisingly, the remaining strains  
310 (*FgTri12*, *FgAbc1*, *FgAbc6*, and *ScPdr5*) all showed increased resistance to BOA, with all having an  
311 estimated EC50 value of 350 ppm.

312 Chemical sensitivity was further analyzed by exposing the yeast strains to 24 xenobiotics  
313 included in the Biolog PM24C plate (Biolog Inc, Hayward, CA, USA) (Figure S4). With the exception of a  
314 marked increased resistance to azole fungicides in the *ScPdr5* positive control and the *FgAbc1* strain,  
315 there was only moderate resistance to xenobiotics for the other transformants. Other than *FgMfs1*, all  
316 strains showed moderately increased resistance to antibiotics and metal salts with the *FgAbc1* and  
317 *ScPdr5* strains additionally having increased resistance to anticancer and other antifungal compounds.  
318 This finding fits into a larger pattern in which the *F. graminearum* Abc1 transporter plays a key role in  
319 the export of endogenous trichothecenes and a broad range of exogenous xenobiotics, including azole  
320 fungicides (Abou Ammar et al. 2013; Gardiner et al. 2013; Lee et al. 2011), providing both increased  
321 virulence and defense for *F. graminearum*.

## 322 Discussion

323 While ABC- and MFS transporters play multiple roles in the normal physiology of fungi, for  
324 pathogenic species, they may also allow resistance to stresses related to host infection and can be  
325 essential for full expression of animal and plant pathogenesis (Cavalheiro et al. 2018; Coleman and

326 Mylonakis 2009). Additionally, transporters are known to confer resistance to man-made antifungal  
327 compounds with consequences in clinical and agricultural settings (Ma and Michailides 2005; Sanglard  
328 2016).

329           Transporters also can be important for the export of fungal secondary metabolites. These  
330 metabolites are typically produced by gene clusters encoding enzymes for the biosynthesis of the  
331 metabolites themselves as well as transporters presumed to allow for metabolite secretion. When these  
332 metabolites are mycotoxins, export mediated by gene cluster-encoded transporters has been suggested  
333 to be important to avoid self-inhibition. However, deletion mutants for the transporters in mycotoxin  
334 gene clusters sometimes can secrete nearly wild-type levels of the toxin and show little or no adverse  
335 impact on growth during toxin-inducing conditions (Chang et al. 2004; Proctor et al. 2003). This has led  
336 to the idea that additional secretion mechanisms may be operative within the cell that also function to  
337 export toxins (O'Mara et al. 2020). For the trichothecene biosynthetic gene cluster in *F. graminearum*,  
338 deletion of the cluster-associated MFS transporter, Tri12, indeed has been shown to have minimal effect  
339 on secretion of DON and related metabolites (Menke et al. 2012). Deletion analysis of an ABC  
340 transporter Abc1 and components of vesicular transport pathways each suggested that alternate  
341 pathways for DON secretion were possible (O'Mara et al. 2020). Here we sought to test the impact of  
342 mutation on multiple transporters in *F. graminearum*, alone and in combination, on pathogenicity to  
343 wheat and DON accumulation *in planta*.

344           None of the transporter deletion mutants used in this study presented altered growth or  
345 macroscopic changes in phenotype when tested on laboratory media (Table S2 and Figure S3) indicating  
346 that the individual and combined effect of these transporters on the normal vegetative growth of *F.*  
347 *graminearum* is minimal. This suggests that these transporters may be associated with other functions  
348 such as the transport of secondary metabolites, which by definition are only produced during limited  
349 parts of the life cycle and are not necessary for primary metabolic function of an organism (Keller et al.

350 2005). While Tri12 is encoded within the trichothecene biosynthetic gene cluster, genes for the *Mfs1*  
351 and *Abc6* lie within the biosynthetic genes clusters for other known natural products; the mycotoxin  
352 Fusarin C and the siderophore Malonichrome, respectively (Sieber et al. 2014; Oide et al. 2014). *Abc1* is  
353 located near (~25 kb) a predicted polyketide synthase, *Pks29*, and an O-methyltransferase (Sieber et al.  
354 2014), and has been suggested to be involved in the transport of numerous *F. graminearum* secondary  
355 metabolites including trichothecenes and zearalenone (Abou Ammar et al. 2013; Lee et al. 2011). Taken  
356 together, there is correlative evidence that these transporters may be involved to varying degrees in  
357 secondary metabolite transport but not in primary vegetative growth.

358 By expressing these transporters in yeast, we sought to directly test their ability to transport  
359 DON and related compounds by measuring the ability of strains to overcome DON toxicity. Yeast strains  
360 expressing *Fusarium* transporters were also tested for sensitivity to a panel of chemicals including the  
361 wheat phytoalexin BOA, which may impact pathogenicity toward wheat (Kettle et al. 2015). The yeast  
362 strain YZGA515 is deficient in all major multidrug resistance transporters (Poppenberger et al. 2003) and  
363 is completely inhibited by 10 ppm 15-ADON and 60 ppm DON (Figure 2), the major trichothecenes  
364 produced by the wild type strain used in this study. As predicted, the *F. graminearum* *Abc1* transporter  
365 performed nearly as well as its yeast ortholog, the *Pdr5* multidrug resistance transporter, for increasing  
366 resistance of YZGA515 to DON, 15-ADON, and 3-ADON (Figure 2). The other *F. graminearum*  
367 transporters tested were not able to increase resistance to DON or 15-ADON although *Abc6* may confer  
368 resistance at higher levels of 3-ADON. Surprisingly, the MFS transporters *Mfs1* and especially *Tri12*,  
369 seemed to allow for greater sensitivity at DON and 15-ADON at lower concentrations.

370 Additionally, yeast strains expressing *FgTri12*, *FgAbc1*, *FgAbc6*, or *ScPdr5* provided similar levels  
371 of increased resistance to BOA (Figure 4). This observation is consistent with the idea that multiple *F.*  
372 *graminearum* MFS and ABC transporters are capable of transporting BOA and thereby conferring  
373 redundant modes of resistance to the phytoalexin. Previously, a  $\Delta abc1$  mutant of *F. graminearum* failed



374 to show increased sensitivity to BOA *in vitro* (Gardiner et al. 2013). However, the concentration of BOA  
375 used in that study was equal to the highest concentration used in the present study (500 ppm), at which  
376 all strains tested here were sensitive. Additionally, several single ABC transporter mutants of *F.*  
377 *graminearum* did not grow at significantly different rates compared to wildtype on multiple  
378 concentrations of BOA (Abou Ammar et al. 2013). Based on our results in yeast, previously published  
379 results may have not detected an effect of individual transporters *in situ* due to functional redundancies  
380 of other MFS and ABC transporters.

381         Except for *Abc1*, there is a poor correspondence between the ability of the transporters to  
382 confer DON resistance in yeast and the ability contribute to DON accumulation by *Fusarium*. This may  
383 reflect a fundamental difference in the manner in which these transporters act in *Fusarium*. The other  
384 membrane-bound transporters studied here (*Tri12*, *Mfs1*, and *Abc6*) may be indirectly associated with  
385 DON accumulation, rather than more directly involved in DON export as with *Abc1*. While the ABC  
386 multidrug resistance transporters are expected to be targeted to the plasma membrane in yeast and  
387 *Fusarium* (Egner et al. 1995; Lee et al. 2011) we have previously noted that *Tri12* in *Fusarium* localizes to  
388 motile vesicles that may fuse with the vacuole or the plasma membrane (Menke et al. 2012). Because  
389 *Tri12* and *Mfs1* expressed in yeast actually increases sensitivity to DON, our hypothesis is that *Tri12* may  
390 facilitate DON uptake by these vesicles that may then be transported to the vacuole for sequestration or  
391 to the plasma membrane for export. Previously we noted that the plasma membrane localized SNARE  
392 protein *Sso2*, essential for subapical vesicular exocytosis, was required for wildtype DON accumulation  
393 (O'Mara et al. 2020). Moreover, combining mutations for *Abc1* and *Sso2* reduced DON accumulation in  
394 an additive manner indicating that both vesicular transport and direct export via the multidrug  
395 transporter *Abc1* contributed to DON export in a non-redundant manner.

396         In conclusion the ABC transporter *Abc1* plays a significant role in the export of the trichothecene  
397 DON both *in vitro* and *in planta* and may act as the primary membrane-bound transporter involved in

398 DON export. Two other membrane-bound transporters studied here, Tri12 and Abc6, show significant  
399 involvement in DON accumulation either *in vitro* or *in planta* but may act indirectly in conjunction with  
400 vesicular transport mechanisms or by allowing for greater virulence necessary for maximum DON  
401 accumulation in wheat by transport of BOA or other small molecules. Disruption of *Abc1* through novel  
402 management techniques such as host-induced or spray-induced gene silencing (HIGS and SIGS  
403 respectively) (Koch et al. 2016; Qi et al. 2019), combined with other management techniques in an  
404 integrated pest management system, may provide better control of FHB.

#### 405 **Acknowledgements**

406 The authors greatly thank Dr. Gerhard Adam of the University of Natural Resources and Life  
407 Sciences, Vienna for generously providing *S. cerevisiae* strain YZGA515. The authors would also like to  
408 thank Dr. Fumiaki Katagiri of the University of Minnesota and Zixuan Zhong of the Research Center of  
409 Bioenergy and Bioremediation at Southwest University, Chongqing, P.R. China for providing helpful  
410 feedback in the development of this research. Funding was provided by United States Department of  
411 Agriculture, United States Wheat and Barley Scab Initiative, award FY18-KI-021 and award 2018-67013-  
412 28512 from the Agriculture and Food Research Initiative of the National Institute of Food and  
413 Agriculture, United States Department of Agriculture. Mention of trade names or commercial products  
414 in this article solely for the purpose of providing specific information and does not imply  
415 recommendation or endorsement by the United States Department of Agriculture (USDA). USDA is an  
416 equal opportunity provider and employer.

#### 417 **Conflicts of Interest**

418 The authors declare that there are no conflicts of interest.

## 419 Literature Cited

- 420 Abou Ammar, G., Tryono, R., Döll, K., Karlovsky, P., Deising, H. B., and Wirsal, S. G. R. 2013. Identification  
421 of ABC transporter genes of *Fusarium graminearum* with roles in azole tolerance and/or virulence. PLoS  
422 One. 8:e79042 Available at:  
423 [http://www.pubmedcentral.nih.gov/articlerender.fcgi?artid=3823976&tool=pmcentrez&rendertype=ab](http://www.pubmedcentral.nih.gov/articlerender.fcgi?artid=3823976&tool=pmcentrez&rendertype=abstract)  
424 [stract](http://www.pubmedcentral.nih.gov/articlerender.fcgi?artid=3823976&tool=pmcentrez&rendertype=abstract).
- 425 Alexander, N. J., McCormick, S. P., and Hohn, T. M. 1999. TRI12, a trichothecene efflux pump from  
426 *Fusarium sporotrichioides*: Gene isolation and expression in yeast. Mol. Gen. Genet. 261:977–984.
- 427 Bahadoor, A., Brauer, E. K., Bosnich, W., Schneiderman, D., Johnston, A., Aubin, Y., et al. 2018. Gramillin  
428 A and B: Cyclic lipopeptides identified as the nonribosomal biosynthetic products of *Fusarium*  
429 *graminearum*. J. Am. Chem. Soc. 140:16783–16791 Available at:  
430 <http://pubs.acs.org/doi/10.1021/jacs.8b10017> [Accessed August 1, 2019].
- 431 Cappellini, R. A., and Peterson, J. L. 1965. Macroconidium formation in submerged cultures by a non-  
432 sporulating strain of *Gibberella zeae*. Mycologia. 57:962 Available at:  
433 <http://www.jstor.org/stable/3756895?origin=crossref> [Accessed March 26, 2018].
- 434 Cavalheiro, M., Pais, P., Galocha, M., and Teixeira, M. C. 2018. Host-pathogen interactions mediated by  
435 MDR transporters in fungi: As pleiotropic as it gets! Genes (Basel). 9 Available at:  
436 <https://pubmed.ncbi.nlm.nih.gov/30004464/> [Accessed September 23, 2020].
- 437 Chang, P. K., Yu, J., and Yu, J. H. 2004. aflT, a MFS transporter-encoding gene located in the aflatoxin  
438 gene cluster, does not have a significant role in aflatoxin secretion. Fungal Genet. Biol. 41:911–920.
- 439 Coleman, J. J., and Mylonakis, E. 2009. Efflux in fungi: La piece de resistance. PLoS Pathog. 5.
- 440 Coleman, J. J., White, G. J., Rodriguez-Carres, M., and Vanetten, H. D. 2011. An ABC transporter and a  
441 cytochrome P450 of *Nectria haematococca* MPVI are virulence factors on pea and are the major  
442 tolerance mechanisms to the phytoalexin pisatin. Mol. Plant. Microbe. Interact. 24:368–376.
- 443 Desjardins, A. E., Proctor, R. H., Bai, G., McCormick, S. P., Shaner, G., Buechley, G., et al. 1996. Reduced  
444 virulence of trichothecene-nonproducing mutants of *Gibberella zeae* in wheat field tests. Mol. Plant-  
445 Microbe Interact. 9:775–781 Available at:  
446 <http://www.apsnet.org/publications/mpmi/backissues/Documents/1996Abstracts/Microbe09-775.htm>.
- 447 Dunham, M. J., Gartenberg, M. R., and Brown, G. W. 2015. *Methods in yeast genetics and genomics : a*  
448 *Cold Spring Harbor Laboratory course manual*. 2015 Editi. Cold Spring Harbor Laboratory Press.
- 449 Egner, R., Mahé, Y., Pandjaitan, R., and Kuchler, K. 1995. Endocytosis and vacuolar degradation of the  
450 plasma membrane-localized Pdr5 ATP-binding cassette multidrug transporter in *Saccharomyces*  
451 *cerevisiae*. Mol. Cell. Biol. 15:5879–5887.
- 452 Fleissner, A., Sopalla, C., and Weltring, K.-M. 2002. An ATP-binding cassette multidrug-resistance  
453 transporter is necessary for tolerance of *Gibberella pulicaris* to phytoalexins and virulence on potato  
454 tubers. Mol. Plant. Microbe. Interact. 15:102–108.
- 455 Fried, H. M., and Warner, J. R. 1981. Cloning of yeast gene for trichodermin resistance and ribosomal  
456 protein L3. Proc. Natl. Acad. Sci. U. S. A. 78:238–42 Available at:  
457 [http://www.pubmedcentral.nih.gov/articlerender.fcgi?artid=319027&tool=pmcentrez&rendertype=abst](http://www.pubmedcentral.nih.gov/articlerender.fcgi?artid=319027&tool=pmcentrez&rendertype=abstract)

- 458 ract.
- 459 Fuchs, U., Czymmek, K. J., and Sweigard, J. A. 2004. Five hydrophobin genes in *Fusarium verticillioides*  
460 include two required for microconidial chain formation. *Fungal Genet. Biol.* 41:852–864 Available at:  
461 <https://www.sciencedirect.com/science/article/pii/S1087184504000672> [Accessed March 26, 2019].
- 462 Gale, L. R., Harrison, S. A., Ward, T. J., O’Donnell, K., Milus, E. A., Gale, S. W., et al. 2011. Nivalenol-type  
463 populations of *Fusarium graminearum* and *F. asiaticum* are prevalent on wheat in southern Louisiana.  
464 *Phytopathology*. 101:124–134 Available at: [http://apsjournals.apsnet.org/doi/10.1094/PHYTO-03-10-](http://apsjournals.apsnet.org/doi/10.1094/PHYTO-03-10-0067)  
465 0067 [Accessed March 26, 2018].
- 466 Gardiner, D. M., Osborne, S., Kazan, K., and Manners, J. M. 2009. Low pH regulates the production of  
467 deoxynivalenol by *Fusarium graminearum*. *Microbiology*. 155:3149–3156.
- 468 Gardiner, D. M., Stephens, A. E., Munn, A. L., and Manners, J. M. 2013. An ABC pleiotropic drug  
469 resistance transporter of *Fusarium graminearum* with a role in crown and root diseases of wheat. *FEMS*  
470 *Microbiol. Lett.* 348:36–45.
- 471 Garreau de Loubresse, N., Prokhorova, I., Holtkamp, W., Rodnina, M. V., Yusupova, G., and Yusupov, M.  
472 2014. Structural basis for the inhibition of the eukaryotic ribosome. *Nature*. 513:517–522 Available at:  
473 <http://dx.doi.org/10.1038/nature13737> [Accessed January 18, 2018].
- 474 Goswami, R. S. 2012. Targeted Gene Replacement in Fungi Using a Split-Marker Approach. *Methods*  
475 *Mol. Biol.* 835:255–269 Available at: <http://link.springer.com/10.1007/978-1-61779-501-5> [Accessed  
476 May 8, 2019].
- 477 Goswami, R. S., and Kistler, H. C. 2005. Pathogenicity and *in planta* mycotoxin accumulation among  
478 members of the *Fusarium graminearum* species complex on wheat and rice. *Phytopathology*. 95:1397–  
479 1404.
- 480 Gulshan, K., and Moye-Rowley, W. S. 2007. Multidrug resistance in fungi. *Eukaryot. Cell*. 6:1933–1942.
- 481 Harris, L. J., and Gleddie, S. C. 2001. A modified Rpl3 gene from rice confers tolerance of the *Fusarium*  
482 *graminearum* mycotoxin deoxynivalenol to transgenic tobacco. *Physiol. Mol. Plant Pathol.* 58:173–181.
- 483 Hothorn, T., Bretz, F., and Westfall, P. 2008. Simultaneous inference in general parametric models.  
484 *Biometrical J.* 50:346–363.
- 485 Imazaki, I., and Kadota, I. 2015. Molecular phylogeny and diversity of *Fusarium* endophytes isolated  
486 from tomato stems. *FEMS Microbiol. Ecol.* 91:fiv098 Available at:  
487 <http://www.ncbi.nlm.nih.gov/pubmed/26298015> [Accessed March 26, 2019].
- 488 Keller, N. P., Turner, G., and Bennett, J. W. 2005. Fungal secondary metabolism — from biochemistry to  
489 genomics. *Nat. Rev. Microbiol.* 3:937–947 Available at:  
490 <http://www.nature.com/doi/10.1038/nrmicro1286>.
- 491 Kettle, A. J., Batley, J., Benfield, A. H., Manners, J. M., Kazan, K., and Gardiner, D. M. 2015. Degradation  
492 of the benzoxazolinone class of phytoalexins is important for virulence of *Fusarium pseudograminearum*  
493 towards wheat. *Mol. Plant Pathol.* 16:946–962 Available at: <http://doi.wiley.com/10.1111/mpp.12250>  
494 [Accessed June 26, 2018].
- 495 Klittich, C., and Leslie, J. F. 1988. Nitrate reduction mutants of *Fusarium moniliforme* (*Gibberella*  
496 *fujikuroi*). *Genetics*. 118:417–23 Available at:

- 497 <https://www.ncbi.nlm.nih.gov/pmc/articles/PMC1203296/pdf/ge1183417.pdf> [Accessed October 22,  
498 2019].
- 499 Koch, A., Biedenkopf, D., Furch, A., Weber, L., Rossbach, O., Abdellatef, E., et al. 2016. An RNAi-based  
500 control of *Fusarium graminearum* infections through spraying of long dsRNAs involves a plant passage  
501 and is controlled by the fungal silencing machinery ed. Savithramma P. Dinesh-Kumar. PLoS Pathog.  
502 12:e1005901 Available at: <http://dx.plos.org/10.1371/journal.ppat.1005901> [Accessed May 15, 2018].
- 503 Kovalchuk, A., and Driessen, A. J. 2010. Phylogenetic analysis of fungal ABC transporters. BMC Genomics.  
504 11:177 Available at: <http://bmcbgenomics.biomedcentral.com/articles/10.1186/1471-2164-11-177>  
505 [Accessed November 20, 2018].
- 506 Lee, S., Son, H., Lee, J., Lee, Y. R., and Lee, Y. W. 2011. A putative ABC transporter gene, *ZRA1*, is required  
507 for zearalenone production in *Gibberella zeae*. Curr. Genet. 57:343–351.
- 508 Lofgren, L. A., LeBlanc, N. R., Certano, A. K., Nachtigall, J., LaBine, K. M., Riddle, J., et al. 2018. *Fusarium*  
509 *graminearum*: pathogen or endophyte of North American grasses? New Phytol. 217:1203–1212  
510 Available at: <http://doi.wiley.com/10.1111/nph.14894> [Accessed April 18, 2018].
- 511 Ma, Z., and Michailides, T. J. 2005. Advances in understanding molecular mechanisms of fungicide  
512 resistance and molecular detection of resistant genotypes in phytopathogenic fungi. Crop Prot. 24:853–  
513 863.
- 514 Menke, J., Dong, Y., and Kistler, H. C. 2012. Tri12p Influences virulence to wheat and trichothecene  
515 accumulation. Mol. Plant-Microbe Interact. 25:1408–1418.
- 516 Menke, J., Weber, J., Broz, K., and Kistler, H. C. 2013. Cellular development associated with induced  
517 mycotoxin synthesis in the filamentous fungus *Fusarium graminearum*. PLoS One. 8:e63077.
- 518 Nakajima, Y., Koseki, N., Sugiura, R., Tominaga, N., Maeda, K., Tokai, T., et al. 2015. Effect of disrupting  
519 the trichothecene efflux pump encoded by FgTri12 in the nivalenol chemotype of *Fusarium*  
520 *graminearum*. J. Gen. Appl. Microbiol. 61:93–96 Available at:  
521 [https://www.jstage.jst.go.jp/article/jgam/61/3/61\\_93/\\_article](https://www.jstage.jst.go.jp/article/jgam/61/3/61_93/_article).
- 522 O’Mara, S. P., Broz, K., Boenisch, M., Zhong, Z., Dong, Y., and Corby Kistler, H. 2020. The *Fusarium*  
523 *graminearum* t-SNARE Sso2 is involved in growth, defense, and DON accumulation and virulence. Mol.  
524 Plant-Microbe Interact. 33:888–901.
- 525 Oide, S., Berthiller, F., Wiesenberger, G., Adam, G., and Turgeon, B. G. 2014. Individual and combined  
526 roles of malonichrome, ferricrocin, and TAFC siderophores in *Fusarium graminearum* pathogenic and  
527 sexual development. Front. Microbiol. 5:759 Available at:  
528 <http://journal.frontiersin.org/article/10.3389/fmicb.2014.00759/abstract> [Accessed May 20, 2020].
- 529 Pasquali, M., and Kistler, C. 2006. *Gibberella zeae* ascospore production and collection for microarray  
530 experiments. J. Vis. Exp. 1:115 Available at: <http://www.ncbi.nlm.nih.gov/pubmed/18704186> [Accessed  
531 March 26, 2018].
- 532 Perlin, M. H., Andrews, J., and Toh, S. S. 2014. *Essential letters in the fungal alphabet: ABC and MFS*  
533 *transporters and their roles in survival and pathogenicity*. Elsevier. Available at:  
534 <http://dx.doi.org/10.1016/B978-0-12-800271-1.00004-4>.
- 535 Pestka, J. J. 2007. Deoxynivalenol: Toxicity, mechanisms and animal health risks. Anim. Feed Sci.  
536 Technol. 137:283–298 Available at: <http://linkinghub.elsevier.com/retrieve/pii/S0377840107002209>.

- 537 Poppenberger, B., Berthiller, F., Lucyshyn, D., Sieberer, T., Schuhmacher, R., Krska, R., et al. 2003.  
538 Detoxification of the *Fusarium* mycotoxin deoxynivalenol by a UDP-glucosyltransferase from *Arabidopsis*  
539 *thaliana*. *J. Biol. Chem.* 278:47905–47914 Available at:  
540 <http://www.jbc.org/lookup/doi/10.1074/jbc.M307552200>.
- 541 Proctor, R. H. 1995. Reduced virulence of *Gibberella zeae* caused by disruption of a trichothecene toxin  
542 biosynthetic gene. *Mol. Plant-Microbe Interact.* 8:593 Available at:  
543 <http://www.ncbi.nlm.nih.gov/pubmed/8589414> [Accessed October 2, 2019].
- 544 Proctor, R. H., Brown, D. W., Plattner, R. D., and Desjardins, A. E. 2003. Co-expression of 15 contiguous  
545 genes delineates a fumonisin biosynthetic gene cluster in *Gibberella moniliformis*. *Fungal Genet. Biol.*  
546 38:237–249.
- 547 Proctor, R. H., McCormick, S. P., Alexander, N. J., and Desjardins, A. E. 2009. Evidence that a secondary  
548 metabolic biosynthetic gene cluster has grown by gene relocation during evolution of the filamentous  
549 fungus *Fusarium*. *Mol. Microbiol.* 74:1128–1142.
- 550 Puhalla, J. E., and Spieth, P. T. 1983. Heterokaryosis in *Fusarium moniliforme*. *Exp. Mycol.* 7:328–335  
551 Available at: <https://www.sciencedirect.com/science/article/pii/0147597583900178> [Accessed October  
552 22, 2019].
- 553 Qi, P. F., Zhang, Y. Z., Liu, C. H., Zhu, J., Chen, Q., Guo, Z. R., et al. 2018. *Fusarium graminearum* ATP-  
554 binding cassette transporter gene FgABCC9 is required for its transportation of salicylic acid, fungicide  
555 resistance, mycelial growth and pathogenicity towards wheat. *Int. J. Mol. Sci.* 19.
- 556 Qi, T., Guo, Jia, Peng, H., Liu, P., Kang, Z., and Guo, Jun. 2019. Host-induced gene silencing: A powerful  
557 strategy to control diseases of wheat and barley. *Int. J. Mol. Sci.* 20:206 Available at:  
558 <http://www.mdpi.com/1422-0067/20/1/206> [Accessed April 17, 2019].
- 559 R Core Team. 2018. R: A language and environment for statistical computing. Available at:  
560 <https://www.r-project.org/>.
- 561 Rocha, O., Ansari, K., and Doohan, F. M. 2005. Effects of trichothecene mycotoxins on eukaryotic cells: A  
562 review. *Food Addit. Contam.* 22:369–378 Available at:  
563 <http://www.tandfonline.com/doi/abs/10.1080/02652030500058403>.
- 564 Rodriguez Estrada, A. E., Hegeman, A., Corby Kistler, H., and May, G. 2011. In vitro interactions between  
565 *Fusarium verticillioides* and *Ustilago maydis* through real-time PCR and metabolic profiling. *Fungal*  
566 *Genet. Biol.*
- 567 Sanglard, D. 2016. Emerging threats in antifungal-resistant fungal pathogens. *Front. Med.* 3:1 Available  
568 at: <http://www.ebi.ac.uk/interpro/entry/IPR011701/> [Accessed September 23, 2020].
- 569 Seong, K.-Y. Y., Pasquali, M., Zhou, X., Song, J., Hilburn, K., McCormick, S., et al. 2009. Global gene  
570 regulation by *Fusarium* transcription factors Tri6 and Tri10 reveals adaptations for toxin biosynthesis.  
571 *Mol. Microbiol.* 72:354–367 Available at: [http://onlinelibrary.wiley.com/store/10.1111/j.1365-  
572 2958.2009.06649.x/asset/j.1365-  
573 2958.2009.06649.x.pdf?v=1&t=hv4dt99w&s=f7b520d8ee2c82b3abbb3cb2768a01898c6ba636](http://onlinelibrary.wiley.com/store/10.1111/j.1365-2958.2009.06649.x/asset/j.1365-2958.2009.06649.x.pdf?v=1&t=hv4dt99w&s=f7b520d8ee2c82b3abbb3cb2768a01898c6ba636).
- 574 Sieber, C. M. K., Lee, W., Wong, P., Münsterkötter, M., Mewes, H. W., Schmeitzl, C., et al. 2014. The  
575 *Fusarium graminearum* genome reveals more secondary metabolite gene clusters and hints of  
576 horizontal gene transfer. *PLoS One.* 9:e110311 Available at:  
577 <http://www.ncbi.nlm.nih.gov/pubmed/25333987> [Accessed November 8, 2019].

- 578 Wachowska, U., Packa, D., and Wiwart, M. 2017. Microbial inhibition of *Fusarium* pathogens and  
579 biological modification of trichothecenes in cereal grains. *Toxins* (Basel). 9:408 Available at:  
580 <http://www.ncbi.nlm.nih.gov/pubmed/29261142> [Accessed March 26, 2019].
- 581 Wang, Q., Chen, D., Wu, M., Zhu, J., Jiang, C., Xu, J.-R., et al. 2018. MFS Transporters and GABA  
582 Metabolism Are Involved in the Self-Defense Against DON in *Fusarium graminearum*. *Front. Plant Sci.*  
583 9:438 Available at: <http://journal.frontiersin.org/article/10.3389/fpls.2018.00438/full> [Accessed April  
584 13, 2018].
- 585 Waweru, B., Turoop, L., Kahangi, E., Coyne, D., and Dubois, T. 2014. Non-pathogenic *Fusarium*  
586 *oxysporum* endophytes provide field control of nematodes, improving yield of banana (*Musa* sp.). *Biol.*  
587 *Control*. 74:82–88 Available at: <https://www.sciencedirect.com/science/article/pii/S1049964414000784>  
588 [Accessed March 26, 2019].
- 589 Wilson, W., Dahl, B., and Nganje, W. 2018. Economic costs of *Fusarium* Head Blight, scab and  
590 deoxynivalenol. *World Mycotoxin J.* 11:291–302 Available at:  
591 <https://www.wageningenacademic.com/doi/10.3920/WMJ2017.2204> [Accessed January 14, 2019].
- 592 Wipfle, R., McCormick, S. P., Proctor, R. H., Teresi, J. M., Hao, G., Ward, T. J., et al. 2019. Synergistic  
593 phytotoxic effects of culmorin and trichothecene mycotoxins. *Toxins* (Basel). 11:555 Available at:  
594 <https://www.mdpi.com/2072-6651/11/10/555> [Accessed May 12, 2020].
- 595 Yin, Y., Wang, Z., Cheng, D., Chen, X., Chen, Y., and Ma, Z. 2018. The ATP-binding protein FgArb1 is  
596 essential for penetration, infectious and normal growth of *Fusarium graminearum*. *New Phytol.*  
597 219:1447–1466.
- 598 Zhang, X.-W., Jia, L.-J., Zhang, Y., Jiang, G., Li, X., Zhang, D., et al. 2012. In planta stage-specific fungal  
599 gene profiling elucidates the molecular strategies of *Fusarium graminearum* growing inside wheat  
600 coleoptiles. *Plant Cell*. 24:5159–76 Available at:  
601 [http://www.pubmedcentral.nih.gov/articlerender.fcgi?artid=3556981&tool=pmcentrez&rendertype=ab](http://www.pubmedcentral.nih.gov/articlerender.fcgi?artid=3556981&tool=pmcentrez&rendertype=abstract)  
602 [stract](http://www.pubmedcentral.nih.gov/articlerender.fcgi?artid=3556981&tool=pmcentrez&rendertype=abstract).
- 603

604 **Figures**

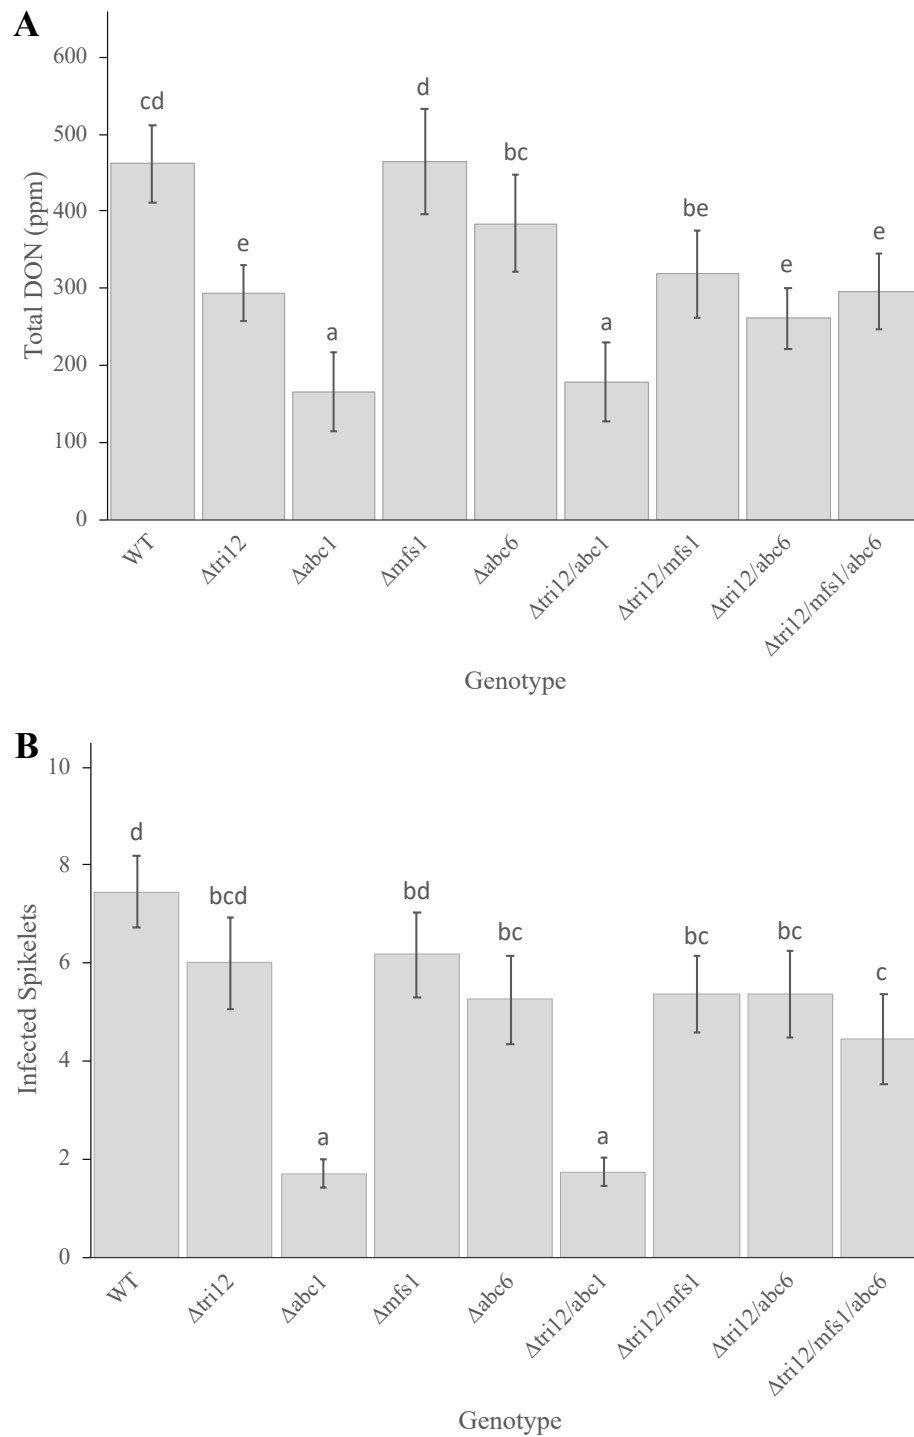

605 **Figure 1: Total DON accumulation *in planta* and pathogenicity of *F. graminearum* transporter mutants.** Total  
606 DON accumulation (A) and disease progression (B) 14 days post inoculation (n=40). Mean + 95% CI. Data analyzed  
607 by one-way ANOVA. Genotypes with the same letter are not significantly different as determined by a Tukey's post  
608 hoc analysis.



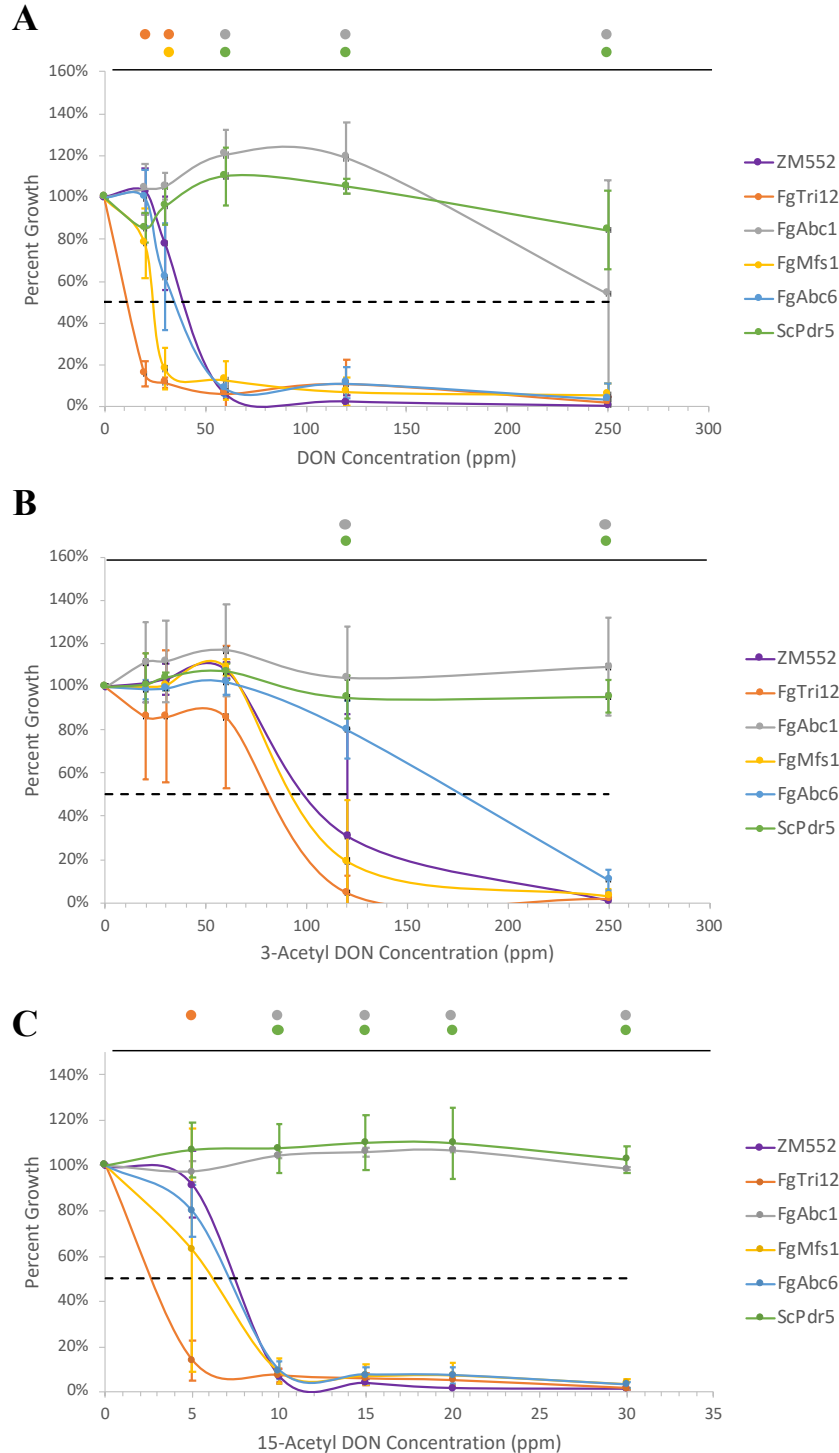

609 **Figure 2: Growth of yeast YZGA515 transformants exposed to exogenous DON and ADON.** Growth of *S. cerevisiae*  
 610 strain YZGA515 expressing *F. graminearum* transporters after 5 days exposure to exogenous (A) DON, (B) 3-ADON,  
 611 and (C) 15-ADON. Measurements are the average (n=3) percent growth compared to the 0 ppm concentration  $\pm$  95%  
 612 confidence interval. Dashed black line indicates EC50. Colored dots above graph indicate genotypes which are  
 613 significantly different ( $p < 0.05$ ) from the ZM552 control at each concentration. One-way ANOVA conducted on raw  
 614 optical density (600 nm) measurements at each concentration.

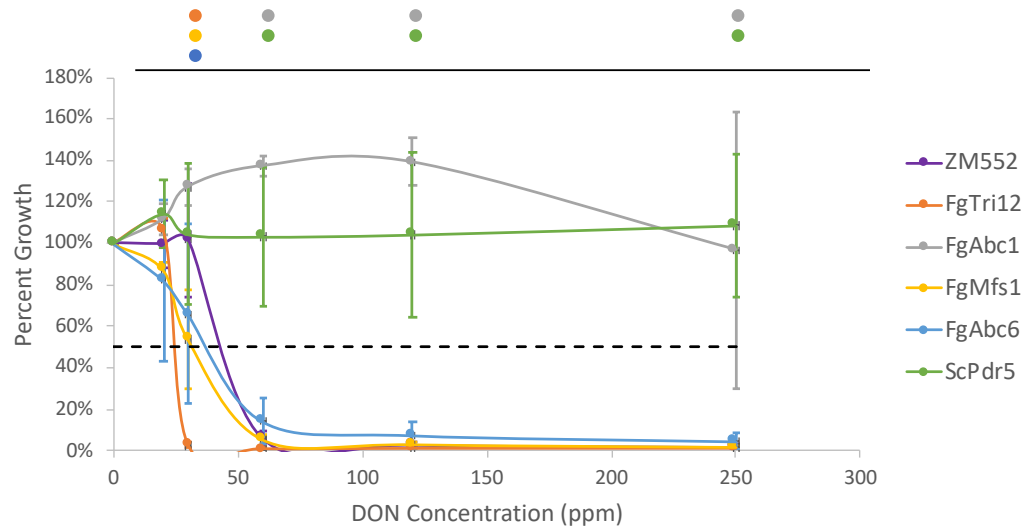

615 **Figure 3: Growth of yeast YZGA515 transformants exposed to exogenous DON at pH 2.5.** Growth of *S. cerevisiae*  
616 strain YZGA515 expressing *F. graminearum* transporters after five days exposure to exogenous DON/ADON at pH  
617 2.5. Measurements are the average (n=3) percent growth compared to the 0 ppm concentration  $\pm$  95% confidence  
618 interval. Dashed black line indicates EC50. Colored dots above graph indicate genotypes which are significantly  
619 different (p<0.05) from the ZM552 control at each concentration. One-way ANOVA conducted on raw optical density  
620 (600 nm) measurements at each concentration.

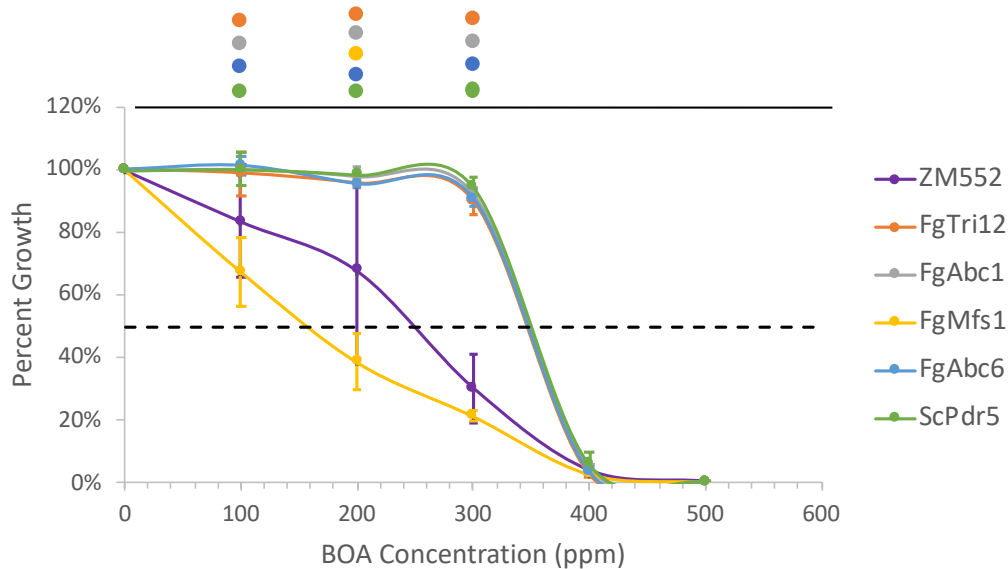

621 **Figure 4: Growth of yeast YZGA515 transformants exposed to exogenous BOA.** Growth of *S. cerevisiae* strain  
622 YZGA515 expressing *F. graminearum* transporters after three days exposure to the plant phytoalexin 2-  
623 benzoxazolinone (BOA). Measurements are the average (n=3) percent growth compared to the 0 ppm concentration  
624  $\pm$  95% confidence interval. All *F. graminearum* transporter transformants showed increased resistance to BOA,  
625 except for the FgMfs1 lines which was more sensitive. Dotted black line indicates EC50. Colored dots above graph  
626 indicate genotypes which are significantly different (p<0.05) from the ZM552 control at each concentration. One-  
627 way ANOVA conducted on raw optical density (600 nm) measurements at each concentration.

## Supplemental Information

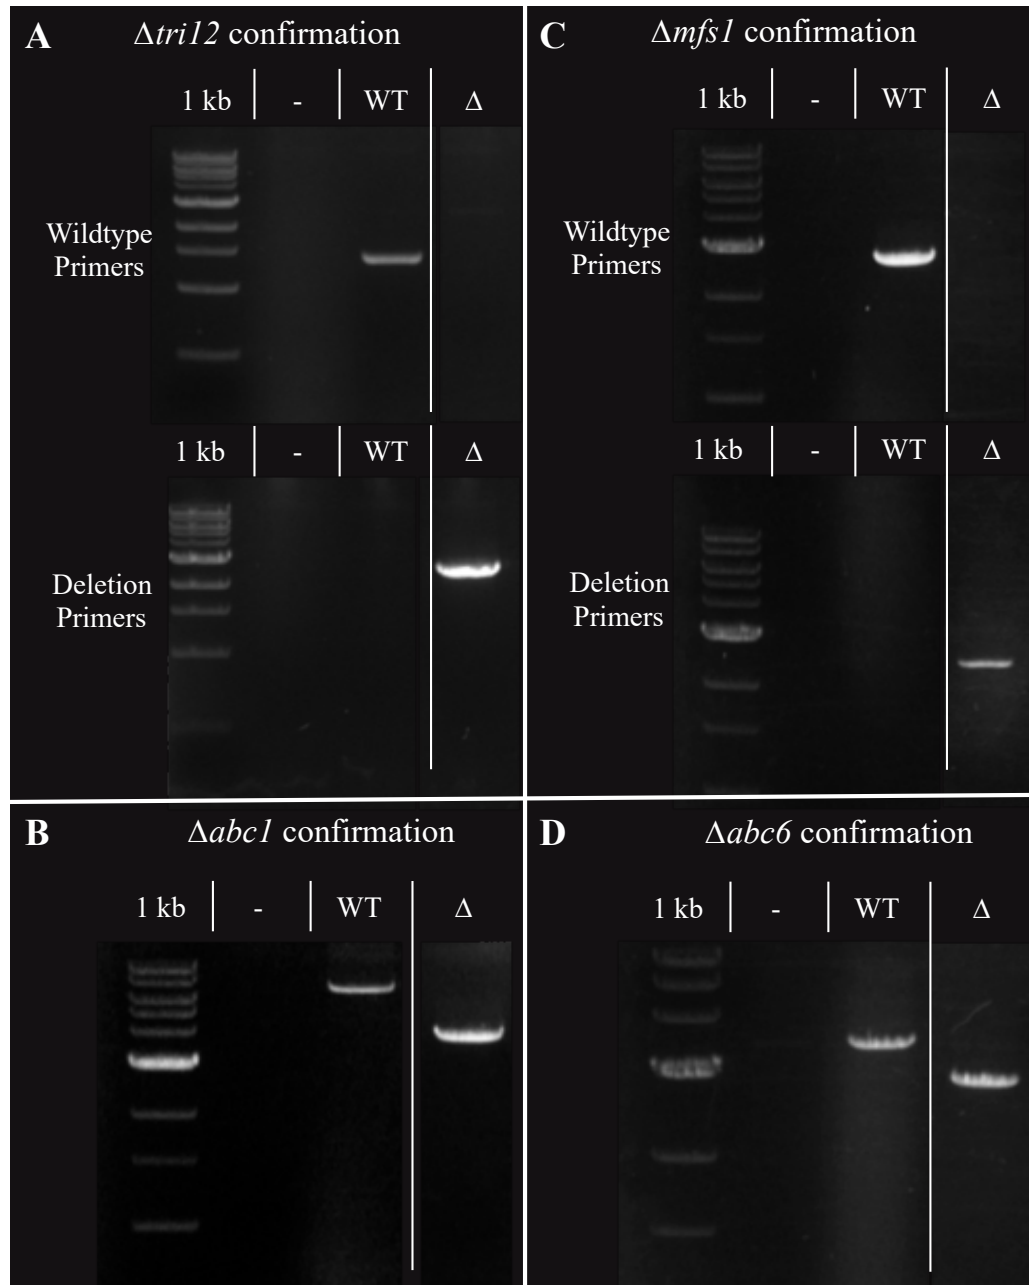

**Figure S1: Confirmation PCR of *F. graminearum* deletion mutants.** Size discrepancy or presence/absence determination of proper genetic deletions for (A)  $\Delta tri12$  knockout, (B)  $\Delta abc1$  knockout, (C)  $\Delta mfs1$  knockout, and (D)  $\Delta abc6$  knockout. Size discrepancy primers flank 5' and 3' of manipulated locus. Presence/absence wild type amplification primers bind upstream to manipulated locus and end of native gene; deletion amplification primers bind upstream to the target locus and end of antibiotic resistance gene. Vertical lines between lanes indicate removed lanes. 1 kb = 1 kb ladder, - = No DNA, WT = *F. graminearum* PH1 DNA,  $\Delta$  = deletion mutant DNA.

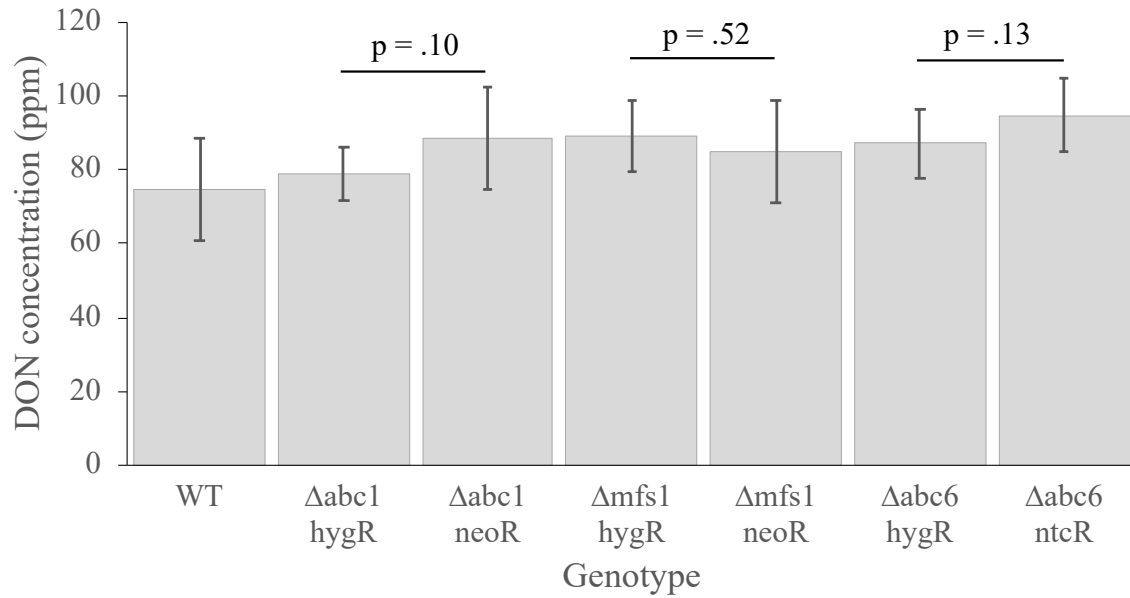

**Figure S2: *In vitro* DON accumulation comparison of independently deleted *F. graminearum* transporters.** Transporter deletions were conducted twice, using different antibiotic selectable markers, to confirm mutant phenotypes. Data analyzed by Student's T-test. All comparisons between independent transformation mutants showed insignificant differences in DON accumulation.

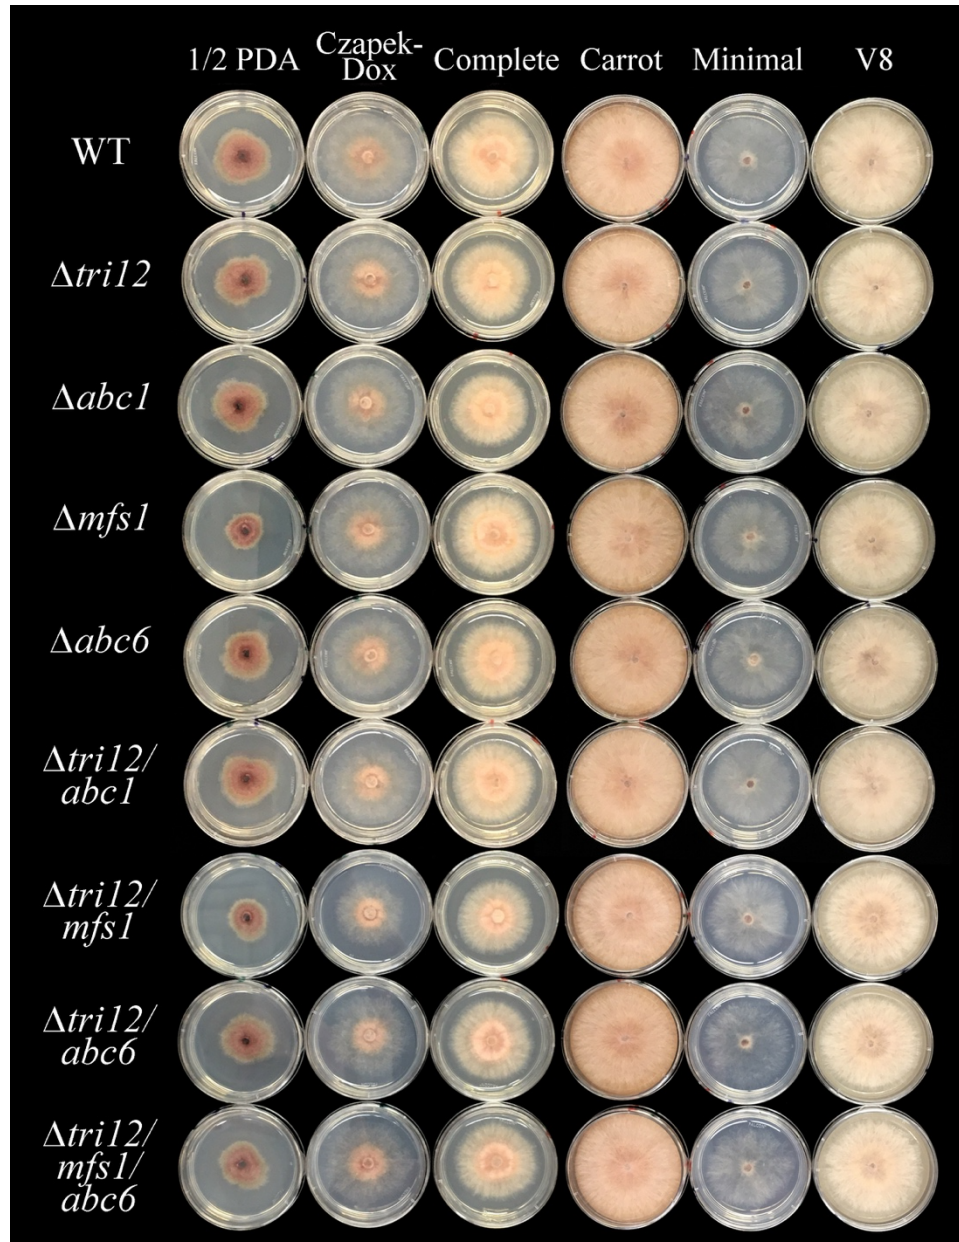

**Figure S3: Phenotype of *F. graminearum* genotypes on laboratory media.** Gene deletion did not result in any overt phenotypic changes in *F. graminearum* mutants, including multi-knockout mutants.

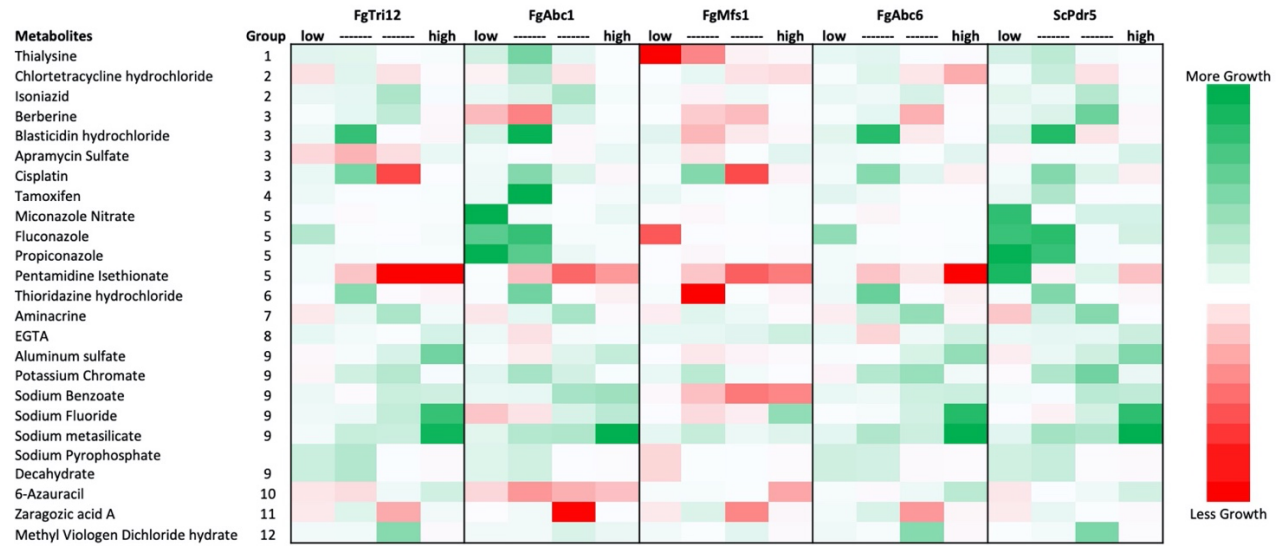

**Figure S4: Growth of *F. graminearum* transporter expressing yeast on xenobiotics.** Relative growth of transformed yeast YZGA515 expressing *F. graminearum* transporters compared to an empty vector control. Green cells indicated more growth of transformant compared to control; red cells indicate less growth. 1=Amino acid analog, 2=Antibacterial, 3=Antibiotic, 4= Anticancer, 5=Antifungal, 6=Antipsychotic, 7=Antiseptic, 8=Chelating Agent, 9=Metal salt, 10=Nucleotide analog, 11= Polyketide, 12=Viologen.

**Table S1: Oligonucleotide primers used for amplification, deletion, and confirmation of *F. graminearum* mutants.**

| Purpose and oligonucleotide                                 | Sequence (5'-3') <sup>nt</sup>                  | Remarks                                           |
|-------------------------------------------------------------|-------------------------------------------------|---------------------------------------------------|
| PCR based amplification of <i>F. graminearum</i> DNA flanks |                                                 |                                                   |
| FGSG_04580 LF1F                                             | AATCCCTCTCCTTTATGCACAAG                         | Used for all <i>Abc1</i> deletion setups          |
| FGSG_04580 LF2R NEO                                         | GGGAACCAATTTGAGTACCCAATTCTATGTTTGCCTGCAAGACAG   | Used for <i>Abc1</i> deletion with neoR construct |
| FGSG_04580 RF3F NEO                                         | GCCTAGTTTCTCGGTACTATGCATATGCTCTTCTGCCTCACCTTC   | Used for <i>Abc1</i> deletion with neoR construct |
| FGSG_04580 RF4R                                             | ACATGTTTGCTATCGTCGGC                            | Used for all <i>Abc1</i> deletion setups          |
| FGSG_07802 LF1F                                             | AGGAGATGTTGTGCTAGTATCCAG                        | Used for all <i>Mfs1</i> deletion setups          |
| FGSG_07802 LF2R NEO                                         | GGGAACCAATTTGAGTACCCAATTCGGGACGCGAAAGAATTTACAGT | Used for <i>Mfs1</i> deletion with neoR construct |
| FGSG_07802 RF3F NEO                                         | GCCTAGTTTCTCGGTACTATGCATATAATTTTGTGAAACGCCAGGA  | Used for <i>Mfs1</i> deletion with neoR construct |
| FGSG_07802 RF4R                                             | AGCATCAACGGAAGTCAAGA                            | Used for all <i>Mfs1</i> deletion setups          |
| FGSG_11028 LF1F                                             | TGGTGCCATTTTGATCGGTCTA                          | Used for all <i>Abc6</i> deletion setups          |
| FGSG_11028 LF2R NAT                                         | TGACTTTTACCATTTCACCGACCCACGGAGACAGCAAATC        | Used for <i>Abc6</i> deletion with ntcR construct |
| FGSG_11028 LF2R NAT                                         | TATAGTGAGTCGTATTACGCGCGCTTACTGTGTGGCTTGATCCTCA  | Used for <i>Abc6</i> deletion with ntcR construct |
| FGSG_11028 RF4R                                             | GACAGAACCAACAGACAATGCC                          | Used for all <i>Abc6</i> deletion setups          |
| PCR based amplification of antibiotic resistance cassette   |                                                 |                                                   |
| CK_216 NEO/F                                                | GAATTGGGTACTCAAATTGGTTCCC                       | Amplification of first 2/3 of NPT construct       |
| CK_217 NE/R                                                 | ATGTTCTTCGTCCAGATCATCCTGA                       | Amplification of first 2/3 of NPT construct       |
| CK_218 EO/F                                                 | CCTGCTCATCACCTTTTCTCACATA                       | Amplification of last 2/3 of NPT construct        |
| CK_219 NEO/R                                                | ATATGCATAGTACCGAGAACTAGGC                       | Amplification of last 2/3 of NPT construct        |
| AL12-5_NAT/F                                                | TGCGGTGAAATGGTAAAAGTCA                          | Amplification of first 2/3 of NAT construct       |
| AL12-6 NA/R                                                 | GTTGACGTTGGTGACCTCC                             | Amplification of first 2/3 of NAT construct       |
| AL12-7_AT/F                                                 | TCCTTCACCACCGACACC                              | Amplification of last 2/3 of NAT construct        |
| AL12-8_NAT/R                                                | AGGTAGTTCTGGTCCATTGGT                           | Amplification of last 2/3 of NAT construct        |
| PCR based confirmation of genetic knockouts                 |                                                 |                                                   |
| FGSG_04580/F                                                | CCAGCCTTGACAATGACGTT                            | Confirmation of <i>Δabc1</i> knockout             |
| FGSG_04580/R                                                | GAAACACCATTCCGCCCG                              | Confirmation of <i>Δabc1</i> knockout             |

|                                                               |                                                     |                                                    |
|---------------------------------------------------------------|-----------------------------------------------------|----------------------------------------------------|
| FGSG_07802/F                                                  | CGTTCCTACTACCACTGCGA                                | Confirmation of $\Delta mfs1$ knockout             |
| FGSG_07802/R                                                  | TCTTGGGGAAGTCAGCGATT                                | Confirmation of $\Delta mfs1$ knockout             |
| FGSG_07802 2R IG                                              | TCAATCTCTGACGACACCTT                                | Confirmation of $\Delta mfs1$ knockout             |
| FGSG_11028/R                                                  | CCAATCCCGTGCTTCTGATG                                | Confirmation of $\Delta abc6$ knockout             |
| FGSG_11028/F                                                  | TCCTTGTTTCATCGTCGGA                                 | Confirmation of $\Delta abc6$ knockout             |
| FGSG_03541/F                                                  | CTCACTCCAGCACTTGTTCCA                               | Confirmation of $\Delta tri12$ knockout            |
| FGSG_03541/R                                                  | GCAACCGCTATAAGATCCA                                 | Confirmation of $\Delta tri12$ knockout            |
| Tri12 GFPscreen5p                                             | TATATGGCTCACGGCTTTCC                                | Confirmation of $\Delta tri12$ knockout            |
| <hr/>                                                         |                                                     |                                                    |
| Heterologous expression of <i>F. graminearum</i> transporters |                                                     |                                                    |
| FgTri12 attB1 F                                               | GGGGACAAGTTTGTACAAAAAAGCAGGCTTCATGACCGCCACCGTCCAT   | Amplification of <i>Tri12</i> from pUC-IDT plasmid |
| FgTri12 attB2 R                                               | GGGGACCACTTTGTACAAGAAAGCTGGGTCTTATGACTGAGTTTTGTCGTC | Amplification of <i>Tri12</i> from pUC-IDT plasmid |
| FgMfs1 attB1 F                                                | GGGGACAAGTTTGTACAAAAAAGCAGGCTTCATGGCGGCTATGGATTCA   | Amplification of <i>Mfs1</i> from pUC-IDT plasmid  |
| FgMfs1 attB2 R                                                | GGGGACCACTTTGTACAAGAAAGCTGGGTCTCAATCCCTTACAACACCCCT | Amplification of <i>Mfs1</i> from pUC-IDT plasmid  |
| FgAbc6 attB1 F                                                | GGGGACAAGTTTGTACAAAAAAGCAGGCTTCATGGCAACCAATGACGGT   | Amplification of <i>Abc6</i> from pUC-IDT plasmid  |
| FgAbc6 attB2 R                                                | GGGGACCACTTTGTACAAGAAAGCTGGGTCTCACAGAGAAATTTGGCAGC  | Amplification of <i>Abc6</i> from pUC-IDT plasmid  |
| M13 Forward                                                   | TGTA AACGACGGCCAGT                                  | Amplification of plasmid inserts                   |
| M13 Reverse                                                   | CAGGAAACAGCTATGACCATG                               | Amplification of plasmid inserts                   |



**Table S2: Colony area (mm<sup>2</sup>) of *F. graminearum* genotypes grown on laboratory media.** Mean  $\pm$  standard deviation (n=3) of *F. graminearum* colonies grown for 3 days on laboratory media. No significant differences in colony area were found between genotypes for each medium ( $p>0.05$ ).

| Strain                   | Medium        |                |               |                |              |               |
|--------------------------|---------------|----------------|---------------|----------------|--------------|---------------|
|                          | 1/2 PDA       | Czapek-Dox     | Complete      | Carrot         | Minimal      | V8            |
| WT                       | 213 $\pm$ 52  | 886 $\pm$ 56   | 709 $\pm$ 104 | 2013 $\pm$ 100 | 830 $\pm$ 20 | 609 $\pm$ 49  |
| $\Delta tri12$           | 445 $\pm$ 204 | 1033 $\pm$ 94  | 843 $\pm$ 36  | 2031 $\pm$ 87  | 909 $\pm$ 75 | 585 $\pm$ 16  |
| $\Delta abc1$            | 358 $\pm$ 22  | 912 $\pm$ 83   | 753 $\pm$ 126 | 1929 $\pm$ 67  | 822 $\pm$ 76 | 530 $\pm$ 15  |
| $\Delta mfs1$            | 333 $\pm$ 26  | 1013 $\pm$ 118 | 812 $\pm$ 40  | 2027 $\pm$ 56  | 923 $\pm$ 51 | 555 $\pm$ 7   |
| $\Delta abc6$            | 327 $\pm$ 11  | 928 $\pm$ 128  | 794 $\pm$ 18  | 2062 $\pm$ 123 | 845 $\pm$ 57 | 551 $\pm$ 30  |
| $\Delta tri12/abc1$      | 200 $\pm$ 16  | 883 $\pm$ 81   | 710 $\pm$ 14  | 1923 $\pm$ 17  | 747 $\pm$ 30 | 579 $\pm$ 23  |
| $\Delta tri12/mfs1$      | 187 $\pm$ 44  | 823 $\pm$ 248  | 678 $\pm$ 228 | 1969 $\pm$ 29  | 798 $\pm$ 87 | 588 $\pm$ 71  |
| $\Delta tri12/abc6$      | 245 $\pm$ 105 | 944 $\pm$ 316  | 489 $\pm$ 187 | 1880 $\pm$ 58  | 807 $\pm$ 92 | 450 $\pm$ 133 |
| $\Delta tri12/mfs1/abc6$ | 266 $\pm$ 147 | 898 $\pm$ 282  | 714 $\pm$ 251 | 1942 $\pm$ 70  | 753 $\pm$ 54 | 561 $\pm$ 48  |
